# Supplementary material for: Risk of rapid evolutionary escape from biomedical interventions targeting SARS-CoV-2 spike protein
Source: PubMed Central journal article supplement (PMC8081162; doi:10.1371/journal.pone.0250780), 2021-04-28
Supplement: pone.0250780.s001.pdf [file pone.0250780.s001.pdf]

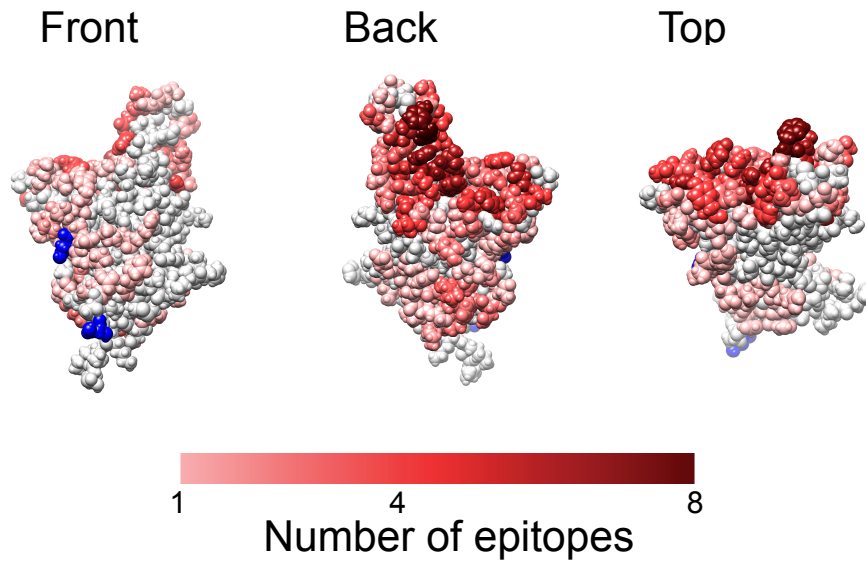

**Figure S1.** Glycosylation in SARS-CoV-2 spike protein RBD. Glycosylated residues are marked in blue, while the remainder of residues are colored by the number of epitopes that contain the residue (red color bar).
