# Supplementary material for: Risk of rapid evolutionary escape from biomedical interventions targeting SARS-CoV-2 spike protein
Source: PubMed Central journal article supplement (PMC8081162; doi:10.1371/journal.pone.0250780), 2021-04-28
Supplement: pone.0250780.s002.pdf [file pone.0250780.s002.pdf]

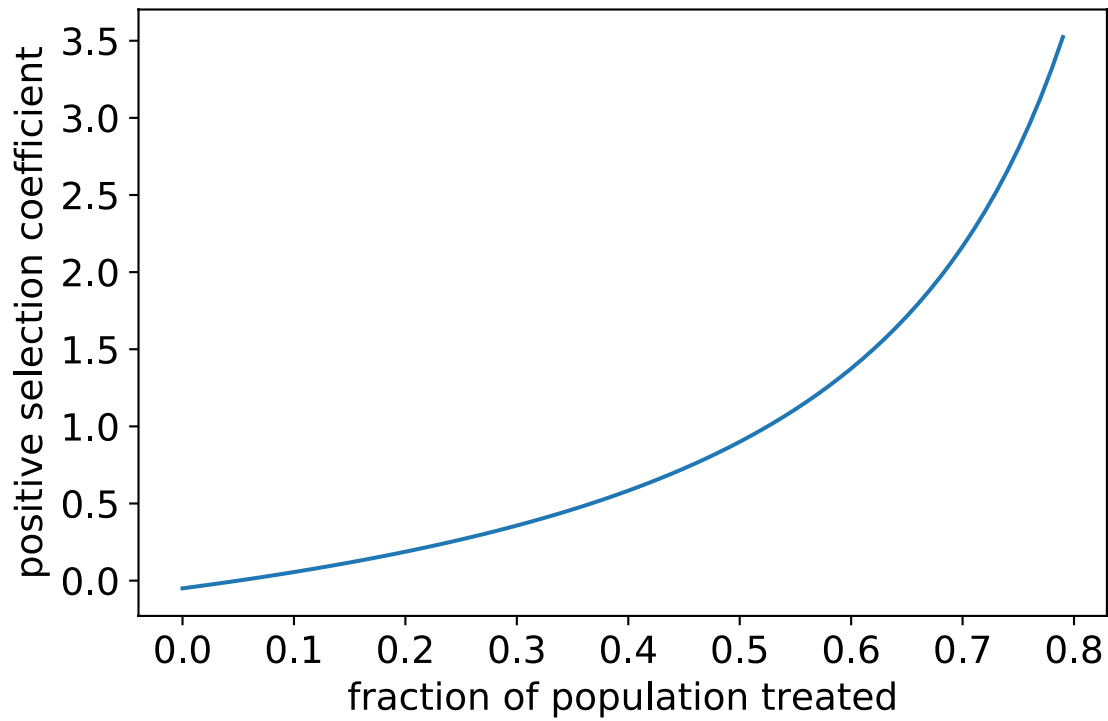

**Figure S2.** Relationship between the fraction of the population that receive a prophylactic that is completely effective in preventing infection from wild-type virus and the strength of selection for an escape mutant.
