# Supplementary material for: Risk of rapid evolutionary escape from biomedical interventions targeting SARS-CoV-2 spike protein
Source: PubMed Central journal article supplement (PMC8081162; doi:10.1371/journal.pone.0250780), 2021-04-28
Supplement: pone.0250780.s005.pdf [file pone.0250780.s005.pdf]

**Table S2.** Antibody escape mutants with highest ACE2 binding affinities.

| <b>Antibody</b> | <b>% Change in Binding Affinity for Optimal Escape Mutant</b> |
|-----------------|---------------------------------------------------------------|
| S309            | 120%                                                          |
| EY6A            | 155%                                                          |
| S2A4            | 120%                                                          |
| S304            | 155%                                                          |
| S2M11           | 117%                                                          |
| B38             | 200%                                                          |
| C105            | 178%                                                          |
| P2B-2F6         | 141%                                                          |
| CB6             | 151%                                                          |
| CC12.1          | 200%                                                          |
| CC12.3          | 200%                                                          |
| CV30            | 200%                                                          |
| Fab 2-4         | 178%                                                          |
| COVA2-04        | 200%                                                          |
| COVA2-39        | 200%                                                          |
| S2H13           | 200%                                                          |
| S2H14           | 200%                                                          |
| S2E12           | 123%                                                          |
| REGN10933       | 178%                                                          |
| REGN10987       | 200%                                                          |
